# Supplementary material for: A newly developed solution for the preservation of short-chain fatty acids, bile acids, and microbiota in fecal specimens
Source: PubMed Central journal article supplement — J Clin Biochem Nutr. 2023 Feb 14;72(3):263–9. doi: 10.3164/jcbn.22-107 (PMC10209596; doi:10.3164/jcbn.22-107), 2023-02-14
Supplement: jcbn22-107sf01.pdf [file jcbn22-107sf01.pdf]

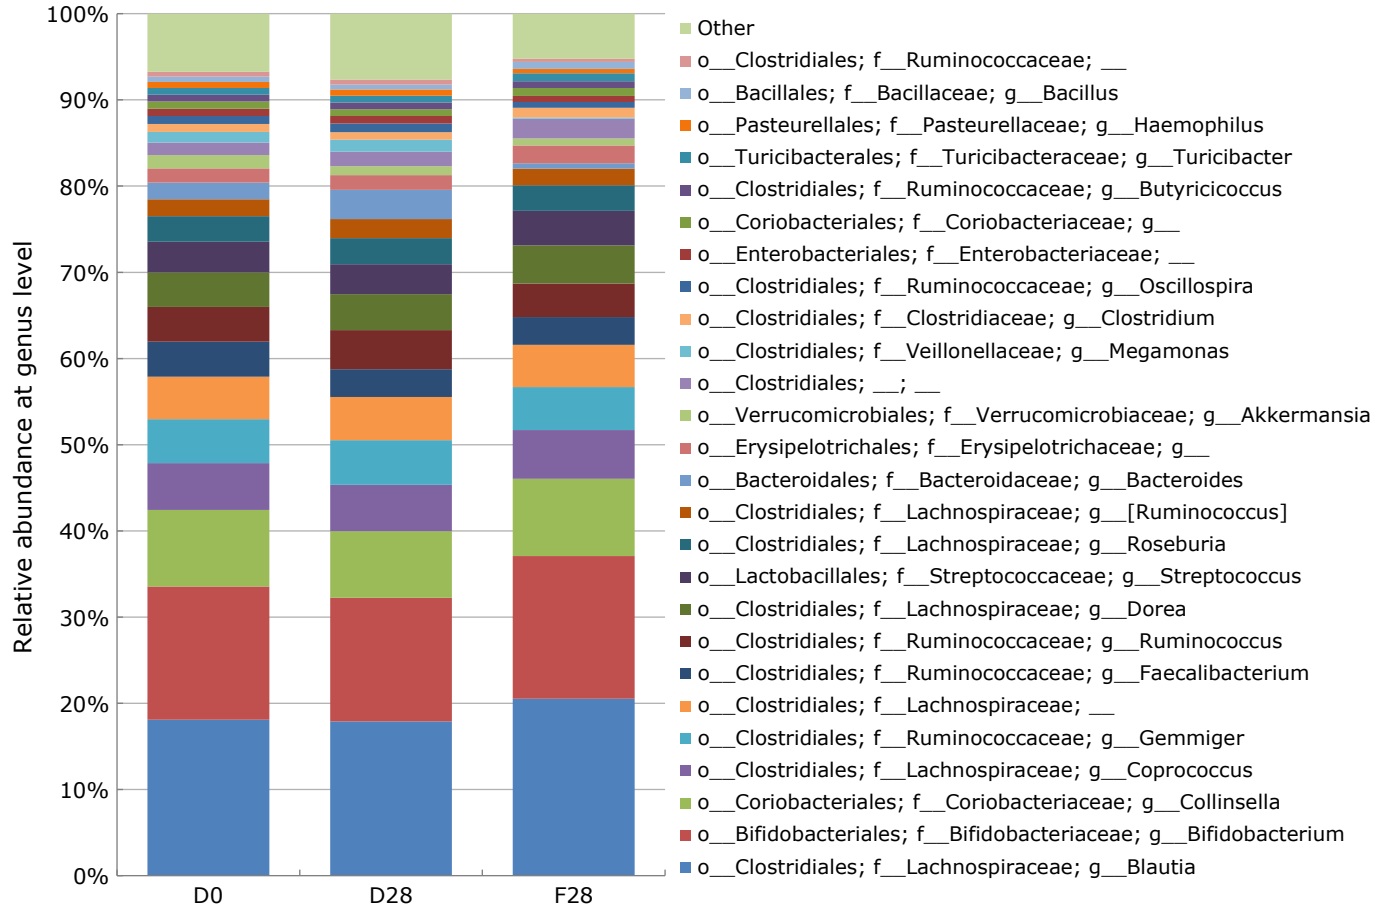

Supplemental Fig. 1. Taxonomic composition of the fecal microbiota in fresh (D0) and stored (D28 or F28) samples at genus level.
