# Supplementary material for: A newly developed solution for the preservation of short-chain fatty acids, bile acids, and microbiota in fecal specimens
Source: PubMed Central journal article supplement — J Clin Biochem Nutr. 2023 Feb 14;72(3):263–9. doi: 10.3164/jcbn.22-107 (PMC10209596; doi:10.3164/jcbn.22-107), 2023-02-14
Supplement: jcbn22-107sf02.pdf [file jcbn22-107sf02.pdf]

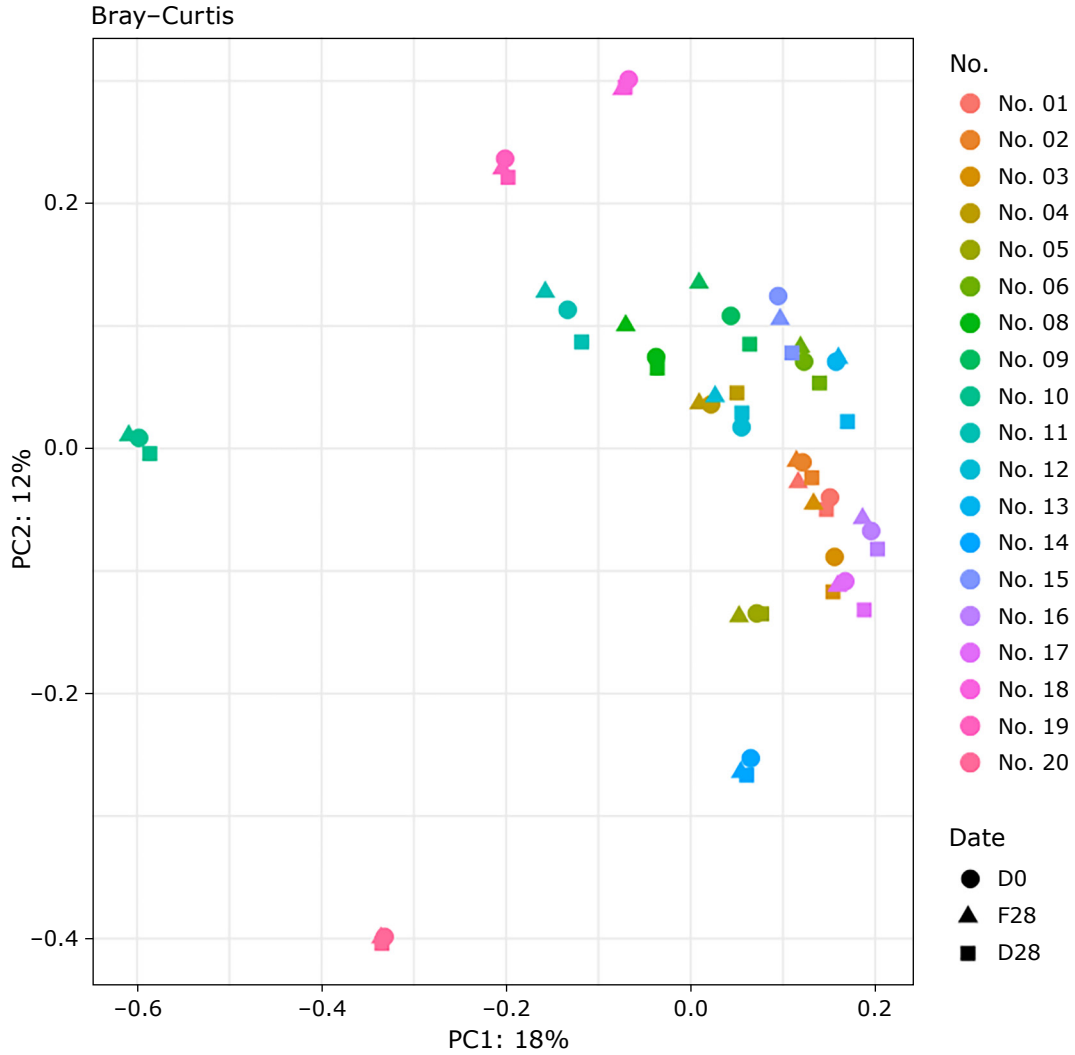

**Supplemental Fig. 2.** Comparative analysis of the microbial community structure based on Bray-Curtis distance among D0 and stored samples (D28 or F28). Principal coordinate analysis (PCoA) was conducted, and samples were plotted on two principal axes (PC1 and PC2) with colors for individual and storage conditions.
