# Supplementary material for: A newly developed solution for the preservation of short-chain fatty acids, bile acids, and microbiota in fecal specimens
Source: PubMed Central journal article supplement — J Clin Biochem Nutr. 2023 Feb 14;72(3):263–9. doi: 10.3164/jcbn.22-107 (PMC10209596; doi:10.3164/jcbn.22-107), 2023-02-14
Supplement: jcbn22-107st01.pdf [file jcbn22-107st01.pdf]

Supplemental Table 1. Analysis datasets of short-chain fatty acids and bile acids in D0, D7, D14, D28 and F28

| Acetic acid (mg/g) |      |      |      |      |      | Propionic acid |        |      |      |      |      | n-butyric acid |        |      |      |      |      | n-valeric acid |        |      |      |      |      | Iso-valeric acid |        |      |      |      |      | Iso-butyric acid |       |        |      |      |      | Lactic acid |       |        |      |      |      |      |      |
|--------------------|------|------|------|------|------|----------------|--------|------|------|------|------|----------------|--------|------|------|------|------|----------------|--------|------|------|------|------|------------------|--------|------|------|------|------|------------------|-------|--------|------|------|------|-------------|-------|--------|------|------|------|------|------|
| Subjects           | D0   | D7   | D14  | D28  | F28  | Subjects       | D0     | D7   | D14  | D28  | F28  | Subjects       | D0     | D7   | D14  | D28  | F28  | Subjects       | D0     | D7   | D14  | D28  | F28  | Subjects         | D0     | D7   | D14  | D28  | F28  | Subjects         | D0    | D7     | D14  | D28  | F28  |             |       |        |      |      |      |      |      |
| No. 1              | 2.14 | 2.41 | 2.60 | 2.57 | 2.16 | No. 1          | 1.12   | 1.14 | 1.20 | 1.12 | 1.13 | No. 1          | 1.11   | 1.12 | 1.18 | 1.07 | 1.07 | No. 1          | 0.24   | 0.23 | 0.24 | 0.20 | 0.23 | No. 1            | 0.41   | 0.42 | 0.47 | 0.39 | 0.41 | No. 1            | 0.15  | 0.14   | 0.11 | 0.29 | 0.12 | No. 1       | nd    | nd     | nd   | nd   | nd   |      |      |
| No. 2              | 3.03 | 3.01 | 3.01 | 3.09 | 3.10 | 2.96           | No. 2  | 2.18 | 2.10 | 2.12 | 2.09 | 2.11           | No. 2  | 1.12 | 1.06 | 1.07 | 1.03 | 1.05           | No. 2  | 0.15 | 0.14 | 0.15 | 0.11 | 0.15             | No. 2  | 0.14 | 0.14 | 0.12 | 0.12 | 0.13             | No. 2 | nd     | nd   | nd   | 0.21 | nd          | No. 2 | nd     | nd   | nd   | nd   | nd   |      |
| No. 3              | 4.78 | 4.63 | 4.63 | 4.69 | 4.78 | 5.12           | No. 3  | 1.34 | 1.27 | 1.27 | 1.32 | 1.34           | No. 3  | 2.00 | 1.94 | 1.93 | 1.93 | 2.02           | No. 3  | 0.16 | 0.16 | 0.14 | 0.15 | 0.16             | No. 3  | 0.12 | 0.13 | nd   | 0.10 | 0.12             | No. 3 | 0.14   | nd   | nd   | 0.13 | nd          | No. 3 | 0.07   | nd   | nd   | 0.07 | nd   | 0.13 |
| No. 4              | 3.69 | 3.68 | 3.68 | 3.82 | 3.83 | 3.76           | No. 4  | 1.83 | 1.77 | 1.80 | 1.75 | 1.83           | No. 4  | 1.35 | 1.29 | 1.29 | 1.22 | 1.33           | No. 4  | 0.34 | 0.32 | 0.33 | 0.27 | 0.33             | No. 4  | 0.14 | 0.13 | 0.13 | 0.14 | 0.13             | 0.15  | No. 4  | 0.15 | nd   | nd   | 0.16        | nd    | No. 4  | nd   | nd   | nd   | nd   | nd   |
| No. 5              | 4.51 | 4.63 | 4.78 | 4.89 | 3.68 | No. 5          | 1.33   | 1.29 | 1.38 | 1.40 | 1.17 | No. 5          | 1.65   | 1.64 | 1.71 | 1.66 | 1.36 | No. 5          | 0.14   | nd   | nd   | nd   | 0.12 | No. 5            | 0.10   | nd   | 0.10 | nd   | nd   | No. 5            | nd    | nd     | nd   | 0.10 | nd   | No. 5       | 0.08  | 0.14   | 0.14 | 0.12 | 0.05 |      |      |
| No. 6              | 2.90 | 3.06 | 3.23 | 3.25 | 3.30 | No. 6          | 1.25   | 1.31 | 1.32 | 1.31 | 1.33 | No. 6          | 1.50   | 1.58 | 1.59 | 1.54 | 1.61 | No. 6          | 0.22   | 0.21 | 0.23 | 0.19 | 0.22 | No. 6            | 0.30   | 0.29 | 0.32 | 0.25 | 0.31 | No. 6            | 0.12  | nd     | nd   | 0.23 | nd   | No. 6       | 0.14  | 0.11   | 0.15 | 0.13 | 0.18 |      |      |
| No. 8              | 2.51 | 2.57 | 2.67 | 2.95 | 2.62 | No. 8          | 1.70   | 1.65 | 1.66 | 1.77 | 1.74 | No. 8          | 0.85   | 0.81 | 0.82 | 0.80 | 0.83 | No. 8          | 0.20   | 0.17 | 0.16 | 0.18 | 0.19 | No. 8            | 0.23   | 0.22 | 0.24 | 0.20 | 0.21 | No. 8            | 0.11  | nd     | 0.13 | 0.26 | nd   | No. 8       | nd    | nd     | 0.05 | nd   | 0.05 |      |      |
| No. 9              | 3.77 | 4.22 | 3.92 | 4.13 | 4.05 | No. 9          | 2.07   | 2.22 | 2.06 | 2.01 | 2.05 | No. 9          | 0.59   | 0.63 | 0.57 | 0.53 | 0.60 | No. 9          | 0.11   | nd   | nd   | 0.10 | 0.11 | No. 9            | 0.11   | 0.13 | nd   | nd   | nd   | No. 9            | nd    | nd     | nd   | 0.21 | nd   | No. 9       | 0.29  | 0.25   | 0.21 | 0.21 | 0.43 |      |      |
| No. 10             | 4.89 | 5.15 | 5.15 | 5.16 | 4.74 | No. 10         | 1.12   | 1.14 | 1.10 | 1.05 | 1.12 | No. 10         | 1.60   | 1.59 | 1.60 | 1.45 | 1.54 | No. 10         | nd     | nd   | nd   | nd   | nd   | No. 10           | nd     | nd   | nd   | nd   | nd   | No. 10           | nd    | nd     | 0.88 | 0.18 | nd   | No. 10      | 0.45  | 0.43   | 0.43 | 0.41 | 0.47 |      |      |
| No. 11             | 2.96 | 2.87 | 3.18 | 3.35 | 3.04 | No. 11         | 0.71   | 0.65 | 0.67 | 0.69 | 0.72 | No. 11         | 0.42   | 0.38 | 0.38 | 0.35 | 0.40 | No. 11         | 0.24   | 0.21 | 0.21 | 0.18 | 0.22 | No. 11           | 0.39   | 0.34 | 0.37 | 0.34 | 0.37 | No. 11           | 0.17  | 0.11   | 0.14 | 0.16 | 0.13 | No. 11      | nd    | nd     | nd   | nd   | nd   |      |      |
| No. 12             | 3.21 | 3.07 | 3.31 | 3.10 | 3.71 | No. 12         | 0.95   | 0.83 | 0.90 | 0.72 | 1.05 | No. 12         | 0.19   | 0.26 | 0.30 | 0.23 | 0.29 | No. 12         | 0.11   | 0.11 | 0.13 |      | 0.18 | No. 12           | 0.26   | 0.18 | 0.21 | 0.17 | 0.26 | No. 12           | 0.13  | nd     | nd   | 0.11 | nd   | No. 12      | 0.06  | nd     | nd   | nd   | 0.05 |      |      |
| No. 13             | 3.71 | 3.43 | 3.43 | 3.45 | 3.56 | 3.76           | No. 13 | 1.19 | 1.12 | 1.14 | 1.15 | 1.13           | No. 13 | 1.26 | 1.19 | 1.16 | 1.16 | 1.18           | No. 13 | 0.32 | 0.30 | 0.29 | 0.29 | 0.28             | No. 13 | 0.19 | 0.18 | 0.18 | 0.17 | 0.16             | 0.17  | No. 13 | 0.12 | nd   | nd   | nd          | nd    | No. 13 | 0.14 | nd   | nd   | 0.06 | 0.12 |
| No. 14             | 3.73 | 3.67 | 3.94 | 3.91 | 3.83 | No. 14         | 1.14   | 1.09 | 1.19 | 1.16 | 1.14 | No. 14         | 1.32   | 1.23 | 1.36 | 1.30 | 1.30 | No. 14         | 0.13   | 0.13 | 0.13 | 0.13 | 0.14 | No. 14           | 0.12   | 0.12 | 0.13 | 0.13 | 0.14 | No. 14           | nd    | nd     | 0.10 | nd   | nd   | No. 14      | nd    | nd     | nd   | nd   | nd   |      |      |
| No. 15             | 3.04 | 2.97 | 3.12 | 3.27 | 2.97 | No. 15         | 1.83   | 1.70 | 1.71 | 1.74 | 1.77 | No. 15         | 0.76   | 0.70 | 0.69 | 0.63 | 0.75 | No. 15         | 0.23   | 0.22 | 0.20 | 0.20 | 0.22 | No. 15           | 0.24   | 0.22 | 0.19 | 0.21 | 0.21 | No. 15           | 0.12  | nd     | 0.13 | 0.15 | nd   | No. 15      | nd    | nd     | nd   | nd   | nd   |      |      |
| No. 16             | 2.54 | 2.66 | 2.65 | 2.79 | 2.74 | No. 16         | 1.06   | 1.06 | 0.95 | 0.99 | 1.03 | No. 16         | 1.61   | 1.61 | 1.53 | 1.47 | 1.60 | No. 16         | 0.25   | 0.25 | 0.17 | 0.23 | 0.21 | No. 16           | 0.43   | 0.42 | 0.36 | 0.36 | 0.41 | No. 16           | 0.20  | 0.11   | 0.10 | 0.14 | 0.11 | No. 16      | 0.05  | nd     | 0.07 | 0.06 | 0.08 |      |      |
| No. 17             | 2.05 | 2.04 | 2.32 | 2.44 | 1.78 | No. 17         | 1.33   | 1.10 | 1.15 | 1.10 | 1.10 | No. 17         | 0.96   | 0.75 | 0.79 | 0.70 | 0.72 | No. 17         | 0.19   | 0.15 | 0.13 | 0.15 | 0.14 | No. 17           | 0.38   | 0.28 | 0.28 | 0.27 | 0.24 | No. 17           | 0.16  | nd     | nd   | 0.17 | nd   | No. 17      | nd    | nd     | nd   | nd   | nd   |      |      |
| No. 18             | 1.18 | 1.29 | 1.46 | 1.79 | 1.40 | No. 18         | 0.80   | 0.79 | 0.87 | 0.79 | 0.78 | No. 18         | 0.37   | 0.34 | 0.38 | 0.29 | 0.35 | No. 18         | nd     | nd   | nd   | nd   | nd   | No. 18           | 0.28   | 0.26 | 0.26 | 0.23 | 0.26 | No. 18           | nd    | nd     | nd   | 0.19 | 0.11 | No. 18      | nd    | nd     | nd   | nd   | nd   |      |      |
| No. 19             | 3.24 | 3.25 | 3.41 | 3.47 | 3.18 | No. 19         | 1.25   | 1.21 | 1.26 | 1.27 | 1.20 | No. 19         | 0.95   | 0.89 | 0.91 | 0.85 | 0.91 | No. 19         | nd     | nd   | nd   | nd   | nd   | No. 19           | 0.11   | nd   | nd   | nd   | nd   | No. 19           | nd    | nd     | nd   | 0.15 | nd   | No. 19      | nd    | nd     | nd   | nd   | nd   |      |      |
| No. 20             | 5.12 | 5.13 | 5.57 | 5.55 | 5.22 | No. 20         | 1.42   | 1.39 | 1.50 | 1.49 | 1.45 | No. 20         | 0.81   | 0.77 | 0.81 | 0.74 | 0.80 | No. 20         | nd     | nd   | nd   | nd   | nd   | No. 20           | nd     | nd   | nd   | nd   | nd   | No. 20           | nd    | nd     | 0.12 | 0.14 | nd   | No. 20      | 0.97  | 1.00   | 0.96 | 0.98 | 1.04 |      |      |

| DCA (µmol/g) |      |      |      |      |      | CA       |      |      |      |      |      | CDCA     |      |      |      |      |      | LCA      |      |      |      |      |      | UDCA     |      |      |      |      |      | GCA      |      |      |      |      |      | 7-oxo-LCA |      |      |      |      |      |
|--------------|------|------|------|------|------|----------|------|------|------|------|------|----------|------|------|------|------|------|----------|------|------|------|------|------|----------|------|------|------|------|------|----------|------|------|------|------|------|-----------|------|------|------|------|------|
| Subjects     | D0   | D7   | D14  | D28  | F28  | Subjects | D0   | D7   | D14  | D28  | F28  | Subjects | D0   | D7   | D14  | D28  | F28  | Subjects | D0   | D7   | D14  | D28  | F28  | Subjects | D0   | D7   | D14  | D28  | F28  | Subjects | D0   | D7   | D14  | D28  | F28  |           |      |      |      |      |      |
| No. 1        | 1.70 | 1.50 | 1.48 | 1.26 | 1.09 | No. 1    | nd   | nd   | nd   | nd   | nd   | No. 1    | nd   | nd   | nd   | nd   | nd   | No. 1    | 1.25 | 1.05 | 1.15 | 0.95 | 1.04 | No. 1    | nd   | nd   | nd   | nd   | nd   | No. 1    | 1.58 | 2.79 | 3.14 | 3.66 | 1.64 | No. 1     | nd   | nd   | nd   | nd   | nd   |
| No. 2        | 1.43 | 1.28 | 1.21 | 0.97 | 1.00 | No. 2    | nd   | nd   | nd   | nd   | nd   | No. 2    | nd   | nd   | nd   | nd   | nd   | No. 2    | 0.87 | 0.69 | 0.96 | 0.60 | 1.02 | No. 2    | nd   | nd   | nd   | nd   | nd   | No. 2    | 0.75 | 0.83 | 0.86 | nd   | nd   | No. 2     | nd   | nd   | nd   | nd   | nd   |
| No. 3        | 1.61 | 1.48 | 1.51 | 1.12 | 1.28 | No. 3    | nd   | nd   | nd   | nd   | nd   | No. 3    | nd   | 0.10 | 0.11 | 0.11 | nd   | No. 3    | 1.73 | 1.36 | 1.31 | 1.08 | 1.60 | No. 3    | nd   | nd   | nd   | nd   | nd   | No. 3    | 3.85 | 3.80 | 3.73 | 1.44 | 2.34 | No. 3     | 0.17 | nd   | nd   | nd   | 0.14 |
| No. 4        | 4.58 | 4.27 | 4.42 | 4.15 | 4.73 | No. 4    | nd   | nd   | nd   | nd   | nd   | No. 4    | nd   | nd   | nd   | nd   | nd   | No. 4    | 2.67 | 2.60 | 2.66 | 2.37 | 2.40 | No. 4    | nd   | nd   | nd   | nd   | nd   | No. 4    | 3.18 | 5.11 | 4.80 | 4.27 | 2.82 | No. 4     | 0.17 | nd   | nd   | nd   | 0.14 |
| No. 5        | 1.64 | 1.77 | 2.17 | 1.90 | 1.74 | No. 5    | 0.70 | 0.57 | 0.64 | 0.59 | 0.64 | No. 5    | 0.53 | 0.45 | 0.52 | 0.42 | 0.55 | No. 5    | 1.13 | 0.84 | 0.92 | 0.94 | 0.80 | No. 5    | 0.18 | 0.15 | 0.16 | 0.19 | 0.14 | No. 5    | 3.15 | 2.51 | 3.10 | 3.86 | 1.57 | No. 5     | 0.19 | 0.47 | 0.45 | 0.59 | 0.15 |
| No. 6        | 5.18 | 4.73 | 5.37 | 4.56 | 5.20 | No. 6    | nd   | nd   | nd   | nd   | nd   | No. 6    | nd   | nd   | nd   | nd   | nd   | No. 6    | 3.66 | 2.72 | 4.00 | 2.22 | 3.10 | No. 6    | nd   | nd   | nd   | nd   | nd   | No. 6    | 0.46 | nd   | nd   | nd   | nd   | No. 6     | 0.17 | nd   | nd   | nd   | 0.14 |
| No. 8        | 0.51 | 0.42 | 0.43 | 0.35 | 0.42 | No. 8    | 2.07 | 2.06 | 2.04 | 1.71 | 2.01 | No. 8    | 0.88 | 0.67 |      |      |      |          |      |      |      |      |      |          |      |      |      |      |      |          |      |      |      |      |      |           |      |      |      |      |      |
